# Epidemiology of Unconventional Histological Subtypes of Urethral Cancer

Mike Wenzel<sup>a, b</sup> Claudia Collà Ruvolo<sup>b, c</sup> Christoph Würnschimmel<sup>b, d</sup>  
Luigi Nocera<sup>b, e</sup> Benedikt Hoeh<sup>a, b</sup> Zhe Tian<sup>b</sup> Fred Saad<sup>b</sup> Alberto Briganti<sup>e</sup>  
Derya Tilki<sup>d, f</sup> Severiné Banek<sup>a</sup> Philipp Mandel<sup>a</sup> Andreas Becker<sup>a</sup>  
Luis A. Kluth<sup>a</sup> Felix K.H. Chun<sup>a</sup> Pierre I. Karakiewicz<sup>b</sup>

<sup>a</sup>Department of Urology, University Hospital Frankfurt, Goethe University Frankfurt, Frankfurt am Main, Germany;

<sup>b</sup>Cancer Prognostics and Health Outcomes Unit, Division of Urology, University of Montréal Health Center, Montréal, QC, Canada; <sup>c</sup>Department of Neurosciences, Reproductive Sciences and Odontostomatology, University of Naples Federico II, Naples, Italy; <sup>d</sup>Martini-Klinik Prostate Cancer Center, University Hospital Hamburg-Eppendorf, Hamburg, Germany; <sup>e</sup>Division of Experimental Oncology, Department of Urology, URI, Urological Research Institute, IRCCS San Raffaele Scientific Institute, Milan, Italy; <sup>f</sup>Department of Urology, University Hospital Hamburg-Eppendorf, Hamburg, Germany

## Keywords

Mullerian type · Lymphoma · Melanocytic type ·  
Neuroendocrine · Sarcoma · Spindle cell

## Abstract

**Introduction:** The aim of the study was to examine cancer-specific mortality (CSM) of unconventional urethral cancers.

**Methods:** Within the SEER (2004–2016) database, we analyzed CSM of 165 patients with unconventional urethral-cancer histology. Kaplan-Meier plots were used to test the effect of unconventional histologies in urethral cancer on CSM. **Results:** Of 165 eligible patients, the Mullerian type accounted for 55 (33.3%) versus melanocytic (26.7%) versus neuroendocrine 25 (15.2%) versus lymphoma 22 (13.3%) versus mesenchymal/sarcoma 15 (9.1%) versus spindle cell 4 (2.1%) patients. Median age at diagnosis was 81 years in spindle cell, 75 in melanocytic, 74 in neuroendocrine and mesenchymal/sarcoma, 67 in lymphoma, and 62 years Mullerian type ( $p < 0.001$ ). Of all, 116 (70.3%) were female. The Mullerian type exhibited the highest female ratio (96.4%) versus the lowest fe-

male ratio in neuroendocrine (24.0%). The Mullerian type was most frequent in African-American females. In Caucasian females, the melanocytic type was most frequent (49.1%). In African-American (38.9%) and Caucasian males (33.3%), neuroendocrine histology was most frequent. Three-year CSM was, respectively, 27.5%, 23.1%, 22.3%, 20.5%, and 16.1% for melanocytic, mesenchymal/sarcoma, Mullerian type, neuroendocrine, and lymphoma histology. Median cancer-specific survival was 106 versus 10 months for combined nonmetastatic versus metastatic nonconventional histologies. **Conclusion:** Important age, sex, racial/ethnic group distribution, and survival differences exist between each unconventional urethral-cancer histological subtypes.

© 2022 The Author(s).

Published by S. Karger AG, Basel

## Introduction

Primary urethral cancer is a very rare cancer with an incidence of 2.7 and 0.6 per million for men and women, respectively [1, 2]. Most common urethral-cancer histo-

**Table 1.** Descriptive characteristics of 165 urethral-cancer patients, stratified according to unconventional histologies, namely, Mullerian type, melanocytic, NEC, lymphoma, mesenchymal/sarcoma, and spindle cell, diagnosed within the SEER database from 2004 to 2016

| Variable                            | Overall<br>N = 165                                                                                                                                                                                                                                                | Mullerian type<br>N = 55 (33.3%)                                         | Melanocytic<br>N = 44 (26.7%)                                       | NEC<br>N = 25 (15.2%)                                               | Lymphoma<br>N = 22 (13.3%)                                         | Mesenchymal/<br>sarcoma<br>N = 15 (9.1%)                        | Spindle cell<br>N = 4 (2.4%)                              |
|-------------------------------------|-------------------------------------------------------------------------------------------------------------------------------------------------------------------------------------------------------------------------------------------------------------------|--------------------------------------------------------------------------|---------------------------------------------------------------------|---------------------------------------------------------------------|--------------------------------------------------------------------|-----------------------------------------------------------------|-----------------------------------------------------------|
| Age at diagnosis                    | Median (IQR)                                                                                                                                                                                                                                                      | 62 (54–68)                                                               | 75 (66–83)                                                          | 74 (66–81)                                                          | 67 (55–80)                                                         | 74 (71–82)                                                      | 81 (70–84)                                                |
| Year of diagnosis                   | Median (IQR)                                                                                                                                                                                                                                                      | 2011 (2006–2014)                                                         | 2010 (2007–2014)                                                    | 2011 (2007–2015)                                                    | 2007 (2004–2014)                                                   | 2013 (2008–2014)                                                | 2016 (2013–2016)                                          |
| Follow-up in months                 | Median (IQR)                                                                                                                                                                                                                                                      | 19 (9–48)                                                                | 28 (17–51)                                                          | 14 (8–50)                                                           | 17 (9–28)                                                          | 36 (11–87)                                                      | 2 (1–2)                                                   |
| Gender                              | Female<br>Male                                                                                                                                                                                                                                                    | 116 (70.3)<br>49 (29.7)                                                  | 53 (96.4)<br>2 (3.6)                                                | 39 (88.6)<br>5 (11.4)                                               | 6 (24.0)<br>19 (76.0)                                              | 12 (54.5)<br>10 (45.5)                                          | 1 (25.0)<br>3 (75.0)                                      |
| Race/ethnicity                      | Caucasian<br>AA<br>Hispanic<br>Other                                                                                                                                                                                                                              | 93 (56.4)<br>42 (25.5)<br>16 (9.7)<br>14 (8.5)                           | 18 (32.7)<br>26 (47.3)<br>6 (10.9)<br>5 (9.1)                       | 33 (75)<br>2 (4.5)<br>3 (6.8)<br>6 (13.6)                           | 17 (68.0)<br>5 (20.0)<br>3 (12.0)<br>0 (0)                         | 12 (54.5)<br>6 (27.3)<br>2 (9.1)<br>2 (9.1)                     | 1 (25.0)<br>2 (50.0)<br>0 (0)<br>1 (25.0)                 |
| TNM stage                           | T <sub>1</sub> N <sub>0</sub> M <sub>0</sub><br>T <sub>2</sub> N <sub>0</sub> M <sub>0</sub><br>T <sub>3–4</sub> N <sub>0</sub> M <sub>0</sub><br>T <sub>1–4</sub> N <sub>1–2</sub> M <sub>0</sub><br>T <sub>1–4</sub> N <sub>0–2</sub> M <sub>1</sub><br>Unknown | 35 (21.2)<br>6 (3.6)<br>47 (28.5)<br>18 (10.9)<br>20 (12.1)<br>39 (23.6) | 7 (12.7)<br>4 (7.3)<br>26 (47.3)<br>10 (18.2)<br>5 (9.1)<br>3 (5.5) | 14 (31.8)<br>1 (2.3)<br>9 (20.5)<br>1 (2.3)<br>3 (6.8)<br>16 (36.4) | 7 (28.0)<br>1 (4.0)<br>3 (12.0)<br>4 (16.0)<br>8 (32.0)<br>2 (8.0) | 3 (13.6)<br>0 (0)<br>2 (9.1)<br>1 (4.5)<br>2 (9.1)<br>14 (63.6) | 0 (0)<br>0 (0)<br>6 (40)<br>2 (13.3)<br>0 (0)<br>3 (20.0) |
| Secondary urethral cancer           | Yes                                                                                                                                                                                                                                                               | 50 (30.3)                                                                | 5 (9.1)                                                             | 16 (36.4)                                                           | 9 (36.0)                                                           | 8 (36.4)                                                        | 1 (25.0)                                                  |
| Treatment                           | Endoscopic/surgery<br>Bi/trimodality<br>Systemic chemotherapy                                                                                                                                                                                                     | 81 (49.1)<br>46 (27.9)<br>18 (10.9)                                      | 26 (47.3)<br>20 (36.4)<br>3 (5.5)                                   | 35 (79.5)<br>6 (13.6)<br>0 (0)                                      | 6 (24.0)<br>9 (36.0)<br>9 (36.0)                                   | 7 (31.8)<br>6 (27.3)<br>6 (27.3)                                | 0 (0)<br>1 (25.0)<br>0 (0)                                |
| Chemotherapy in metastatic patients | Yes                                                                                                                                                                                                                                                               | 9 (45.0)                                                                 | 1 (20.0)                                                            | 1 (33.3)                                                            | 6 (75.0)                                                           | 1 (50.0)                                                        | 0 (0)                                                     |
| Social economic status              | 1. Quartile<br>2–4. Quartile                                                                                                                                                                                                                                      | 37 (22.4)<br>128 (77.6)                                                  | 6 (10.9)<br>49 (89.1)                                               | 12 (27.3)<br>32 (72.7)                                              | 5 (20.0)<br>20 (80.0)                                              | 6 (27.3)<br>16 (72.7)                                           | 3 (75.0)<br>1 (25.0)                                      |

**Fig. 1.** Stacked barplots depicting sex distribution according to unconventional histological subtypes of 165 urethral-cancer patients. NEC, neuroendocrine; Spindle, spindle cell.

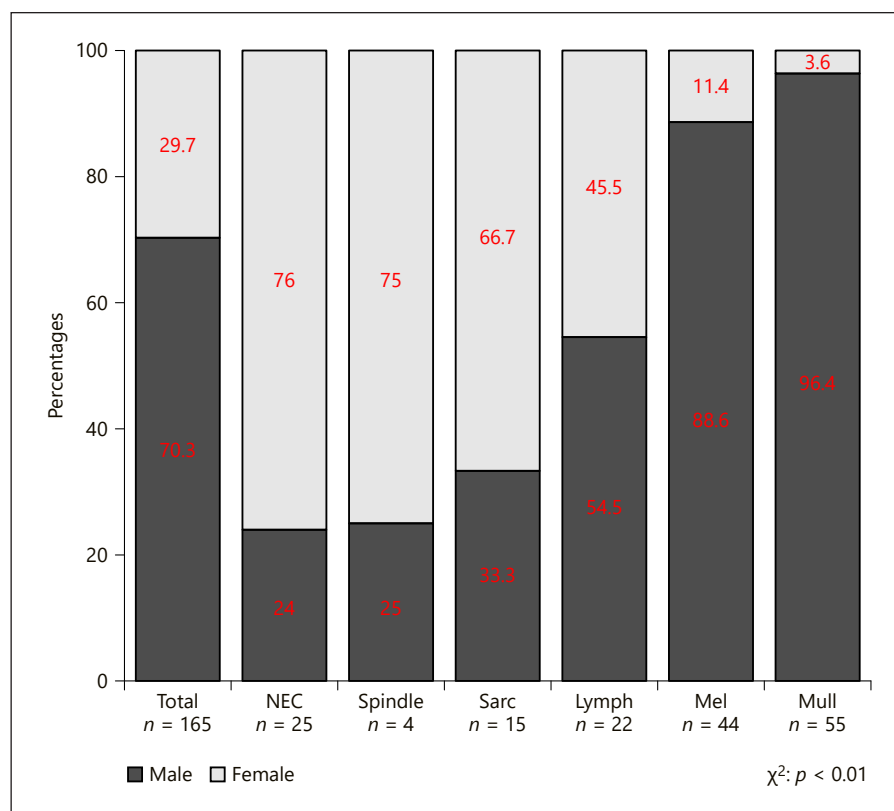

logical subtypes are urothelial, squamous-cell carcinoma (SCC), and adenocarcinoma [3–10]. Since urethral cancer has been studied in very small patient groups, only more historical studies as well as case reports have focused on other unconventional histological subtypes, instead of urothelial, SCC, and adenocarcinoma of the urethra [11–20]. To the best of our knowledge, no previous investigation compared different unconventional urethral-cancer histologies.

We addressed this void and relied on the Surveillance, Epidemiology, and End Results (SEER) database (2004–2016). We hypothesized that patients' sex and racial/ethnic distribution, as well as cancer-specific mortality (CSM) across unconventional histologies of urethral cancer may differ.

## Material and Methods

### Study Population

The current SEER database samples over 34% of the US population and approximates it in demographic composition and cancer incidence [21]. Within the SEER database 2004–2016, we identified patients aged ≥18 years with histologically confirmed ure-

thral cancer (International Classification of Disease for Oncology site code C68.0). Histological subtypes were defined according to WHO criteria [22]. Urothelial, SCC, adenocarcinoma, and unknown histologies were excluded. Cases identified only at autopsy or death certificate were also excluded. TNM stage was used according the 8th edition of malignant tumors [23]. Racial/ethnic groups were defined as Caucasian, African-American (AA), Hispanic, or other racial/ethnic groups. Those selection criteria resulted in 165 urethral-cancer patients with unconventional histologies.

### Statistical Analysis

Descriptive statistics included frequencies and proportions for categorical variables. Means, medians, and interquartile ranges were reported for continuously coded variables. The  $\chi^2$  tested the statistical significance in proportions' differences. The *t* test and Kruskal-Wallis test examined the statistical significance of means' and distributions' differences. Trend tests were performed to explore differences and according to stage at presentation.

Descriptive characteristics were tabulated. Subsequently, Kaplan-Meier plots and multivariable cox regression models were fitted to depict CSM for unconventional histological urethral-cancer subtypes, as well as in the overall cohort of metastatic urethral cancer. All tests were two sided with a level of significance set at  $p < 0.05$  and R software environment for statistical computing and graphics (version 3.4.3) was used for all analyses.

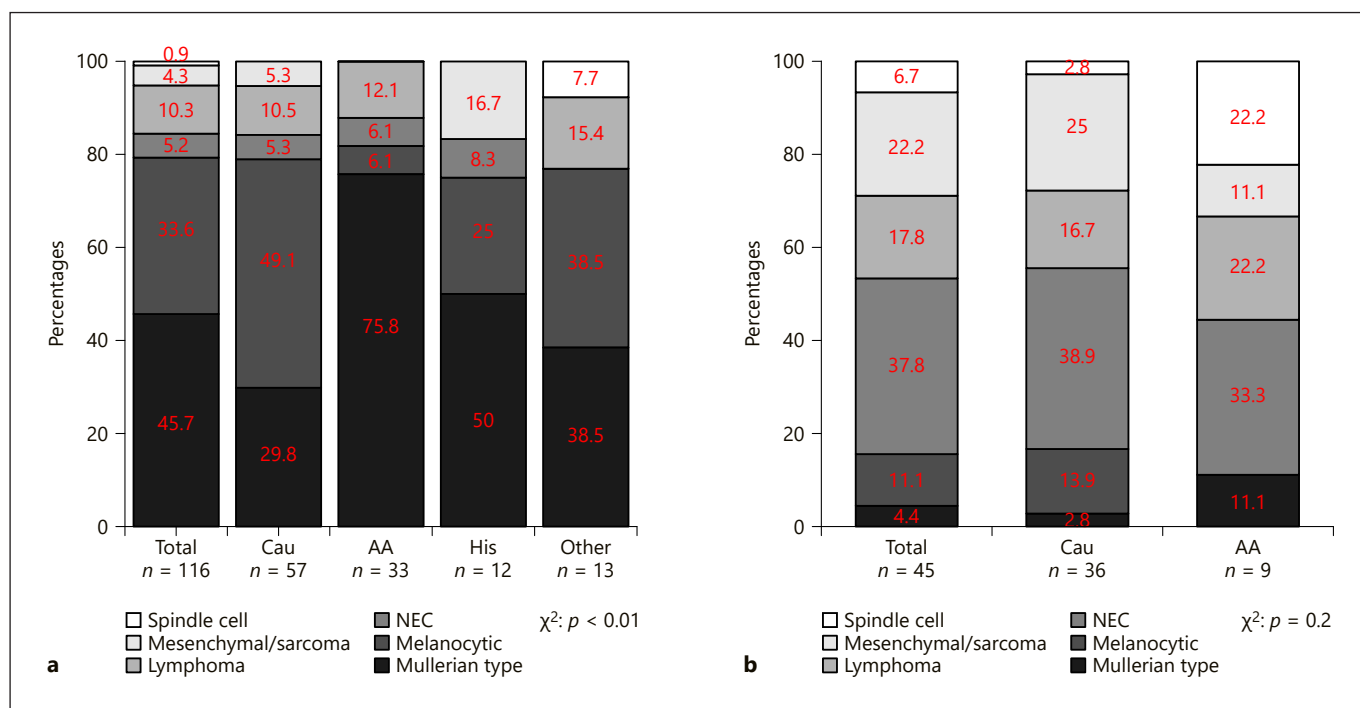

**Fig. 2.** Stacked barplots depicting the distribution of unconventional urethral-cancer histological subtypes according to racial/ethnic groups in females (**a**) and in males (**b**). Due to few observations, no analyses could be performed according to Hispanics and other racial/ethnic groups in males. NEC, neuroendocrine; AA, African-American.

## Results

### Descriptive Characteristics of the Study Population

Of 165 eligible urethral-cancer patients, the Mullerian type accounted for 55 (33.3%) versus melanocytic type (26.7%) versus 25 (15.2%) neuroendocrine (NEC) versus 22 (13.3%) lymphoma versus 15 (9.1%) mesenchymal/sarcoma versus four (2.1%) spindle cell patients, respectively (Table 1). Of all unconventional urethral-cancer patients, 116 (70.3%) were female. Median age at diagnosis was highest in spindle cell urethral cancer (81 years), followed by melanocytic type (75 years), NEC and mesenchymal/sarcoma (both 74 years), lymphoma (67 years), and Mullerian type (62 years), in that order ( $p < 0.001$ ). Overall, 20 patients (12.1%) harbored metastatic disease, of whom 9 (45.0%) received chemotherapy. Median follow-up was 19 months (IQR 9–48) and was longest in the Mullerian type (28 months, IQR 17–51) and shortest in spindle cell carcinoma (2 months, IQR 1–2). Finally, also secondary urethral-cancer rates differed according to unconventional urethral histology and ranged from 9.1% (Mullerian type) to 73.3% mesenchymal/sarcoma.

### Sex Distribution in Unconventional Histologies or Urethral Cancer

Overall, females accounted for 70.3% of all patients with unconventional histology of urethral cancer (Fig. 1). Moreover, absolute rates of females differed significantly across all unconventional urethral-cancer histologies ( $p < 0.01$ ). The lowest proportion of females was recorded in NEC histology (24.0%) and spindle cell (25.0%) as well as mesenchymal/sarcoma tumors of the urethra (33.3%). Conversely, the highest rates of female patients with unconventional histologies of urethral cancer were recorded in melanocytic (88.6%) and Mullerian-type histology of urethral cancer (96.4%). Almost equally distributed sex proportions were recorded in lymphoma histology (54.5% females).

### Distribution of Unconventional Histologies of Urethral Cancers in Racial/Ethnic Groups according to Patient Sex

Mullerian-type urethral cancer (Fig. 2) was most frequent in AA females (75.8%), followed by Hispanics (50%), other racial/ethnic groups (35.7%), and Cauca-

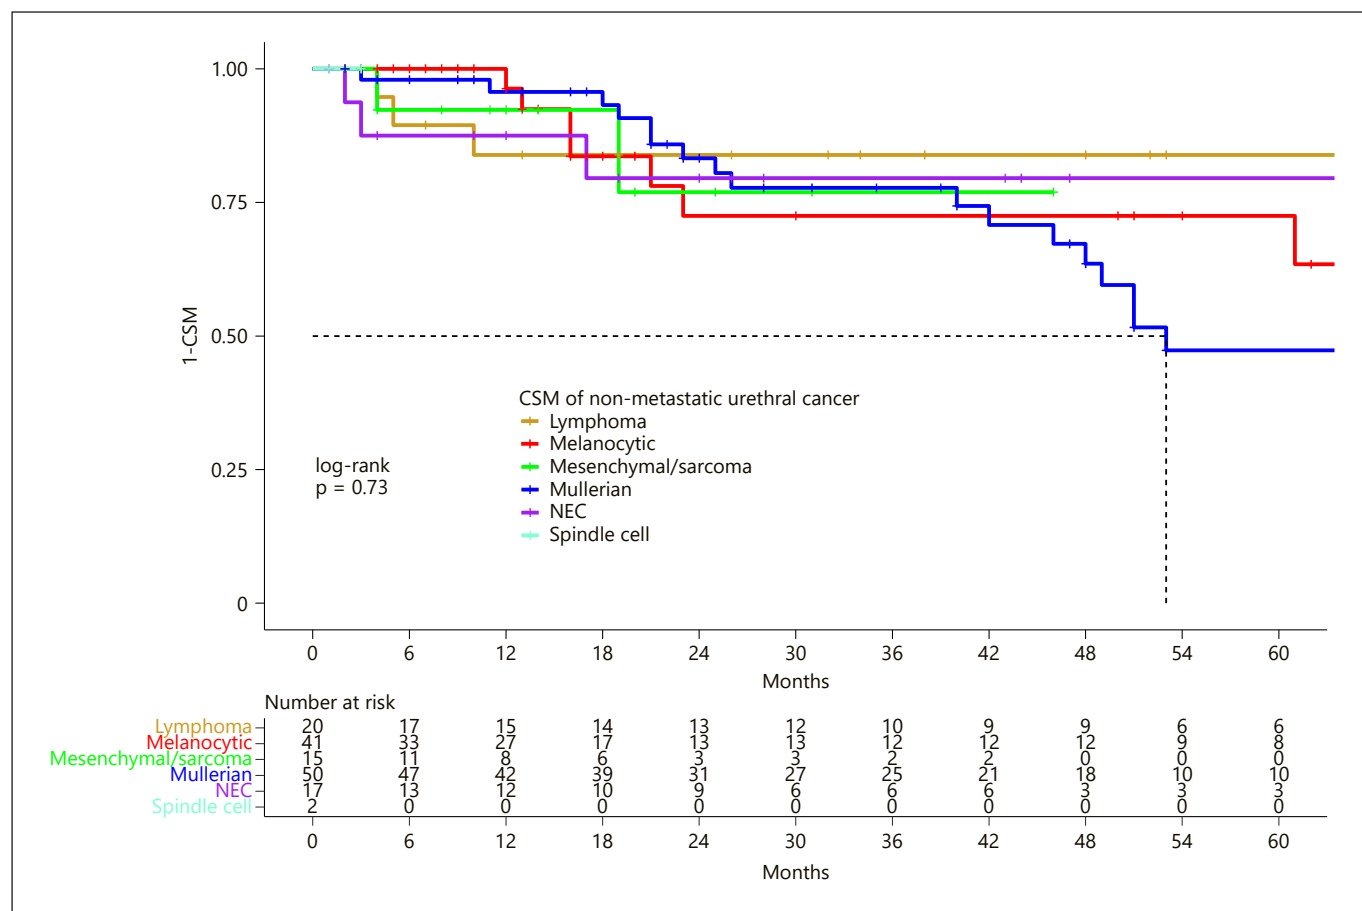

**Fig. 3.** Kaplan-Meier plot illustrating cancer-specific mortality (CSM) for nonmetastatic urethral-cancer patients according to unconventional histological subtypes. NEC, neuroendocrine.

sians (29.8%), in that order. Conversely, the melanocytic type was most frequently in Caucasian females (49.1%) and 42.9% in other racial groups, 25% in Hispanics, and 6.1% in AA females with unconventional urethral cancer. In AAs (38.9%), as well as Caucasian males (33.3%), NEC histology was the most frequent unconventional histology of urethral cancer. Conversely, in males, Mullerian-type tumor accounted only for 11.1% in AAs and 2.8% in Caucasians. Due to few observations, comparisons could only be made between Caucasians and AAs in males.

#### CSM Differences in Unconventional Histologies in Nonmetastatic and Metastatic Urethral Cancer

Due to heterogeneity in natural tumor histology, we first focused on CSM differences in nonmetastatic unconventional histologies of urethral cancer. Here (Fig. 3), 3-year CSM was, respectively, 27.5%, 23.1%, 22.3%, 20.5%, and 16.1% for melanocytic, mesenchymal/sarcoma, Mul-

lerian type, NEC, and lymphoma histology of urethral cancer. In Mullerian-type tumor, median cancer-specific survival was 53 months. Due to few observations, no CSM curve for spindle cell histologies could be computed.

After combining unconventional histologies of non-metastatic urethral cancer, median cancer-specific survival was 106 months (Fig. 4). Conversely, median cancer-specific survival of unconventional histologies of metastatic urethral cancer was 10 months.

#### Discussion

We hypothesized that patients' sex and racial/ethnic distribution, as well as cancer-specific survival across unconventional histologies of urethral cancer may differ. We tested this hypothesis within the SEER database and made several important observations.

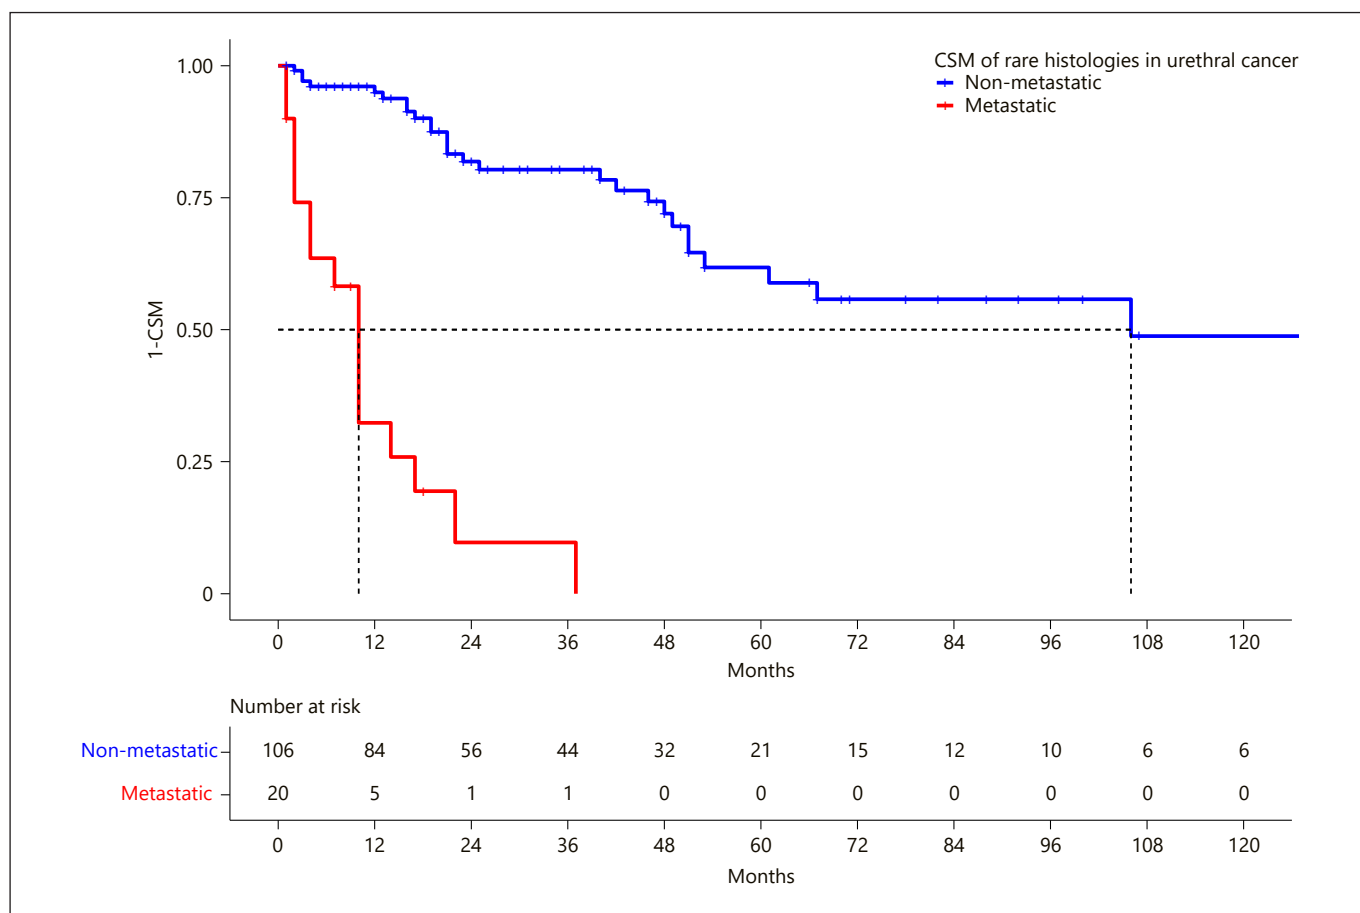

**Fig. 4.** Kaplan-Meier plots illustrating cancer-specific mortality (CSM) for nonmetastatic (a) and metastatic (b) unconventional urethral-cancer histological subtypes.

First, we identified important differences in baseline characteristics of unconventional histologies of urethral cancer. Specifically, Mullerian-type tumor was the most frequent (33%) melanocytic cancer (27%), the second most frequent histology of unconventional urethral-cancer histologies. Conversely, spindle cell histology is a very rare histological subtype (2.4%) of urethral cancer. Moreover, median age at diagnosis was youngest in Mullerian-type tumor (62 years), and the oldest age at diagnosis was recorded in spindle cell histology (81 years). To the best of our knowledge, no previous investigation focused comparisons of unconventional urethral-cancer histologies. In consequence, our data cannot be directly compared to other studies since those do not exist. However, a more historical population-based study by Patel et al. [11] (SEER database 1973–2014) also investigated the epidemiology of 61 patients with Mullerian-type histology of urethral cancer. In consequence, Mullerian-type his-

tology may represent the fourth most common histology in urethral cancer after urothelial, SCC, and adenocarcinoma [2, 3, 10, 24, 25]. Since the literature provides only case reports about melanocytic tumors of the urethra and bladder cancer, the largest cohort of melanocytic tumors consists of 16 patients; our study provides the largest contribution to the medical literature of the epidemiology of those unconventional urethral-cancer histological subtypes [26, 27].

Second, we identified important differences in unconventional histological subtypes of urethral cancer according to patients' sex. In total, females exhibited more frequently unconventional histologies of urethral cancer than males (70 vs. 30%). Moreover, the highest proportion of males was recorded in NEC (76%) and spindle cell histology (75%). Conversely, the highest proportions of females were recorded in the predominant histological subtype of unconventional histologies, namely, Mulleri-



an-type (96%) or melanocytic histology (89%). These observations indicate a higher proportion of females harboring rare histologies of urethral cancer and are in an agreement with previous publications [4, 5, 12, 24, 28]. For example, Abudurexiti et al. [12] also showed higher proportions of females with nonurothelial, non-SCC, and nonadenocarcinoma histologies of urethral cancer, relative to the three most frequent histological subtypes, where males are usually predominant except for adenocarcinoma histological subtype.

Third, in further analyses, we stratified the patients' sex distribution according to four examined racial/ethnic groups regarding unconventional urethral-cancer histologies. Here, in Caucasian and other racial/ethnic group females, the most frequent rare histology was melanocytic tumor (49 and 43%). Conversely, in AA and Hispanic females, the most frequent unconventional histology was the Mullerian type (76 and 50%). Conversely, in Caucasian and AA males, the predominant unconventional histology of urethral cancer was NEC tumors (39 and 33%). These observations are important since incidence rates of urethral-cancer patients differ between sexes and additionally also differ between race/ethnic groups as it was already shown for example in adenocarcinoma urethral cancer in AA females [1, 29].

Finally, CSM analyses of nonmetastatic and metastatic unconventional urethral-cancer histologies yielded important observations. For example, no clinically meaningful CSM differences in nonmetastatic unconventional urethral-cancer histology patients could be observed within the first 2 years after diagnosis. Unfortunately, due to few observations, no separate CSM analyses could be computed for males and females.

Additionally, nonmetastatic unconventional urethral-cancer histology patients harbored a median survival of 106 months. Conversely, metastatic unconventional urethral-cancer histology patients harbored a median survival of 10 months. These data may show a survival improvement relative to the more historical study by Abudurexiti et al. [12] (1978–2015) with a median CSM of 61 months for rare urethral histologies in general, without stratifying according to metastatic versus nonmetastatic disease. These observations should be considered in clinical practice, when patients with unconventional histologies of urethral cancer are seen and counseled.

Our work has limitations and has to be interpreted in the context of its retrospective and population-based design. Our cohort is based on a relatively small sample size that resulted in lack of significant differences in some subgroup comparisons. However, it should be empha-

sized that the SEER database is designed with the intent of providing proportional representation of the US population. In consequence, few if any other databases will provide a larger sample of those excessively rare unconventional histological subgroups of urethral-cancer patients. As in all SEER-based analyses, comorbidities were not available and could lead to confounding of CSM rates. Finally, due to small sample sizes, we grouped patients within unconventional urethral-cancer histologies, as previously reported for unconventional histologies [30]. As a result, it is possible that some of these individual subtypes of unconventional histologies may have more favorable survival than others or vice versa (e.g., in lymphomas). In consequence, specific conclusions regarding comparisons of CSM between individual subtypes of unconventional histologies need to be made with caution. Moreover, differences in primary and secondary cancer of the urethral cancer may exist [31].

## Conclusion

Taken together, unconventional urethral-cancer histologies are excessively rare, and nonetheless, differences exist between each unconventional histological subtype according to age at diagnosis, sex distribution, as well as distribution according to racial/ethnic groups. Second, Mullerian-type tumor is the most frequent unconventional histology of urethral cancer, followed by melanocytic-type histology. Finally, CSM differences in nonmetastatic unconventional histologies are marginal, and survival in metastatic stage is dismal.

## Statement of Ethics

Ethical approval was not required for this study in accordance with local/national guidelines. Written informed consent from participants was not required in accordance with local/national guidelines.

## Conflicts of Interest Statement

The authors have no conflicts of interest to declare.

## Funding Sources

This manuscript did not receive any funding.

## Authors Contributions

Wenzel Mike: manuscript writing/editing, protocol/project development, and data analysis. Collà Ruvolo Claudia, Kluth Luis, Chun Felix K. H, and Karakiewicz Pierre: manuscript writing/editing and protocol/project development. Würnschimmel Christoph: data collection and management. Nocera Luigi, Hoeh Benedikt, and Tian Zhe: data analysis. Saad Fred, Briganti Alberto, Tilki Derya, Banek Severine, Mandel Philipp, and Becker Andreas: manuscript writing/editing.

## Data Availability Statement

Data for this manuscript are derived from the SEER database, which can be found online at <https://seer.cancer.gov>.

## References

- Wenzel M, Nocera L, Collà Ruvolo C, Würnschimmel C, Tian Z, Shariat SF, et al. Incidence rates and contemporary trends in primary urethral cancer. *Research Square*. [Preprint]. 2021 [cited 2021 Feb 24].
- Gakis G, Witjes JA, Compérat E, Cowan NC, De Santis M, Lebre T, et al. EAU guidelines on primary urethral carcinoma. *Eur Urol*. 2013 Nov;64(5):823–30.
- Aleksic I, Rais-Bahrami S, Daugherty M, Agarwal PK, Vourganti S, Bratslavsky G, et al. Primary urethral carcinoma: a surveillance, epidemiology, and end results data analysis identifying predictors of cancer-specific survival. *Urol Ann*. 2018 Jun;10(2):170.
- Champ CE, Hegarty SE, Shen X, Mishra MV, Dicker AP, Trabulsi EJ, et al. Prognostic factors and outcomes after definitive treatment of female urethral cancer: a population-based analysis. *Urology*. 2012 Aug;80(2):374–81.
- Rabbani F. Prognostic factors in male urethral cancer. *Cancer*. 2011 Jun 1;117(11):2426–34.
- Derksen JW, Visser O, de la Rivière GB, Meuleman EJ, Heldeweg EA, Lagerveld BW, et al. Primary urethral carcinoma in females: an epidemiologic study on demographical factors, histological types, tumour stage and survival. *World J Urol*. 2013 Feb;31(1):147–53.
- Mano R, Vertosick EA, Sarcona J, Sjöberg DD, Benfante NE, Donahue TF, et al. Primary urethral cancer: treatment patterns and associated outcomes. *BJU Int*. 2020 Apr 26;126(3):359–66.
- Wenzel M, Nocera L, Collà Ruvolo C, Würnschimmel C, Tian Z, Shariat SF, et al. Sex-related differences include stage, histology, and survival in urethral cancer patients. *Clin Genitourin Cancer*. 2021 Jan 6;19(2):135–43.
- Wenzel M, Deuker M, Stolzenbach F, Nocera L, Collà Ruvolo C, Tian Z, et al. The effect of race/ethnicity on histological subtype distribution, stage at presentation and cancer specific survival in urethral cancer. *Urol Oncol*. 2021 Jun;39(6):369.e9–e17.
- Wenzel M, Deuker M, Nocera M, Collà Ruvolo C, Tian Z, Shariat SF. Comparison between urothelial and non-urothelial urethral cancer. *Front Oncol*. 2021;10:629692.
- Patel M, Im J, Ivy A, Maraboyina S, Kim T. The epidemiology and role of surgery in the treatment of urethral clear cell carcinoma. *Int Urol Nephrol*. 2020 Jan;52(1):51–7.
- Abudurexiti M, Wang J, Shao N, Wan F-N, Zhu Y, Dai B, et al. Prognosis of rare pathological primary urethral carcinoma. *Cancer Manag Res*. 2018;10:6815–22.
- Gandhi JS, Khurana A, Tewari A, Mehta A. Clear cell adenocarcinoma of the male urethral tract. *Indian J Pathol Microbiol*. 2012 Jun;55(2):245.
- Mehra R, Vats P, Kalyana-Sundaram S, Udager AM, Roh M, Alva A, et al. Primary urethral clear-cell adenocarcinoma: comprehensive analysis by surgical pathology, cytopathology, and next-generation sequencing. *Am J Pathol*. 2014 Mar;184(3):584–91.
- Ahallal Y, Tazi MF, Khallouk A, Tazi E, Benlemlih A, El Fassi MJ, et al. Primary leiomyosarcoma of the male urethra: a case report. *Cases J*. 2009 Nov 18;2(1):207.
- D'Arrigo L, Costa A, Fraggetta F, Pennisi M, Pepe P, Aragona F, et al. Carcinosarcoma of the female urethra. *Urol Int*. 2016;96(3):370–2.
- Palmasano F, Lorusso V, Spinelli MG, Dell'Orto PG, Montanari E. Blastoid variant of mantle cell lymphoma of the female urethra mimicking a caruncle: a rare but highly aggressive subtype case with literature review. *Arch Ital Urol Androl*. 2019 Mar 29;91(1):49–50.
- Sisler K, Knutson A, McLennan M. Primary small cell neuroendocrine tumor within a urethral diverticulum. *Obstet Gynecol*. 2019;133(2):308–11.
- Facio FN, Spessoto LC, Ferraz de Arruda GJ, Arruda JF, Ferraz de Arruda JG, Facio MFW, et al. Primary mixed glandular-endocrine tumor of the male proximal urethra: a case report. *Urol Case Rep*. 2016 May;6:1–3.
- Gupta R, Bhatti SS, Dinda AK, Singh MK. Primary melanoma of the urethra: a rare neoplasm of the urinary tract. *Int Urol Nephrol*. 2007;39(3):833–6.
- National Cancer Institute. About the SEER program [Internet]. Surveillance Epidemiology and End Results. 2020. [cited 2020 August 20]. Available from: <https://seer.cancer.gov/about/overview.html>.
- Humphrey PA, Moch H, Cubilla AL, Ulbright TM, Reuter VE. The 2016 WHO classification of tumours of the urinary system and male genital organs-part B: prostate and bladder tumours. *Eur Urol*. 2016;70(1):106–19.
- Brierley JD, Gospodarowicz MK, Wittekind C; Union for International Cancer Control. *TNM classification of malignant tumors*. Chichester, West Sussex: Wiley, Blackwell; 2017.
- Swartz MA, Porter MP, Lin DW, Weiss NS. Incidence of primary urethral carcinoma in the United States. *Urology*. 2006 Dec;68(6):1164–8.
- Zhang M, Adeniran AJ, Vikram R, Tamboli P, Pettaway C, Bondaruk J, et al. Carcinoma of the urethra. *Hum Pathol*. 2018;72:35–44.
- Zeighami S, Soltani M, Khajeh F, Ariafar A, Jahanabadi Z, Miladpour B, et al. Primary amelanotic melanoma of the male urethra: a rare entity and diagnostic challenge. *Qatar Med J*. 2020;2020(1):11.
- Pacella M, Gallo F, Gastaldi C, Ambruosi C, Carmignani G. Primary malignant melanoma of the bladder. *Int J Urol*. 2006 May;13(5):635–7.
- Wei Y, Wu Y-P, Xu N, Li X-D, Chen S-H, Cai H, et al. Sex-related differences in clinicopathological features and survival of patients with primary urethral carcinoma: a population-based study. *Oncotargets Ther*. 2017;10:3381–9.
- Wenzel M, Deuker M, Stolzenbach F, Nocera L, Collà Ruvolo C, Tian Z, et al. The effect of race/ethnicity on histological subtype distribution, stage at presentation and cancer specific survival in urethral cancer. *Urol Oncol*. 2021 Jun;39(6):369.e9–e17.
- Wenzel M, Siron N, Collà Ruvolo C, Nocera L, Würnschimmel C, Tian Z, et al. Temporal trends, tumor characteristics and stage-specific survival in penile non-squamous cell carcinoma vs. squamous cell carcinoma. *Cancer Causes Control*. 2022 Jan;33(1):25–35.
- Wenzel M, Würnschimmel C, Nocera L, Ruvolo CC, Tian Z, Saad F, et al. The effect of primary urological cancers on survival in men with secondary prostate cancer. *Prostate*. 2021 Nov;81(15):1149–58.
